# Supplementary material for: Avoiding electrochemical indentations: a CNT-cocooned LiCoO2 electrode with ultra-stable high-voltage cycling
Source: Royal Society of Chemistry journal article supplement (doi:10.1039/d4ee00722k), 2024-01-01
Supplement: d4ee00722k1.pdf [file d4ee00722k1.pdf]

## Supplementary information

### Avoiding Electrochemical Indentations: CNT-cocooned $\text{LiCoO}_2$

#### Electrode with Ultra-stable High-voltage Cycling

Zhi Zhu<sup>a,b\*</sup>, Shuanglong Xu<sup>a</sup>, Zhenjie Wang<sup>a</sup>, Xiaohui Yan<sup>a</sup>, Guiyin Xu<sup>b</sup>, Yimeng Huang<sup>c</sup>, Yuping Wu<sup>a</sup>, Yin Zhang<sup>b\*</sup> and Ju Li<sup>b,c\*</sup>

<sup>a</sup> Confucius Energy Storage Lab, School of Energy and Environment & Z Energy-storage Center, Southeast University, Nanjing, Jiangsu, 211189, CN

<sup>b</sup> Department of Nuclear Science and Engineering, Massachusetts Institute of Technology, Cambridge, MA 02139, USA

<sup>c</sup> Department of Materials Science and Engineering, Massachusetts Institute of Technology, Cambridge, MA 02139, USA

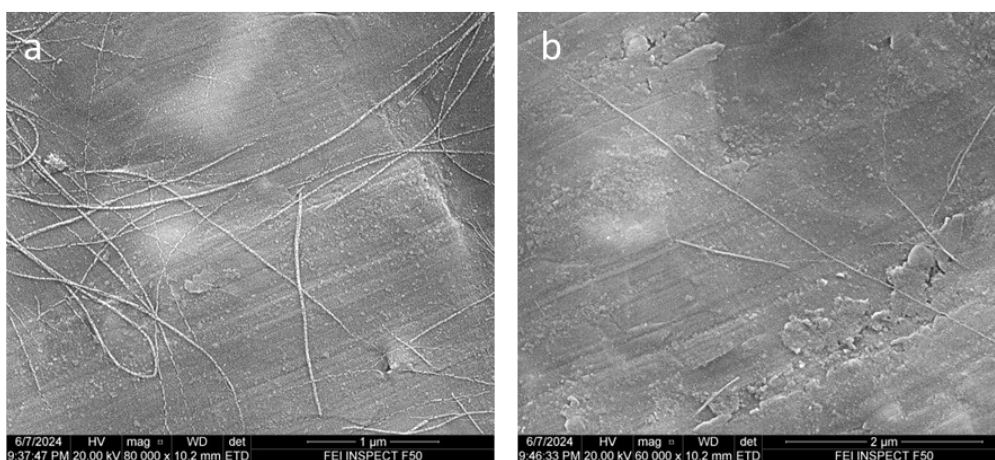

**Supplementary Fig. 1** The morphology of the CNT used CNT-LCO

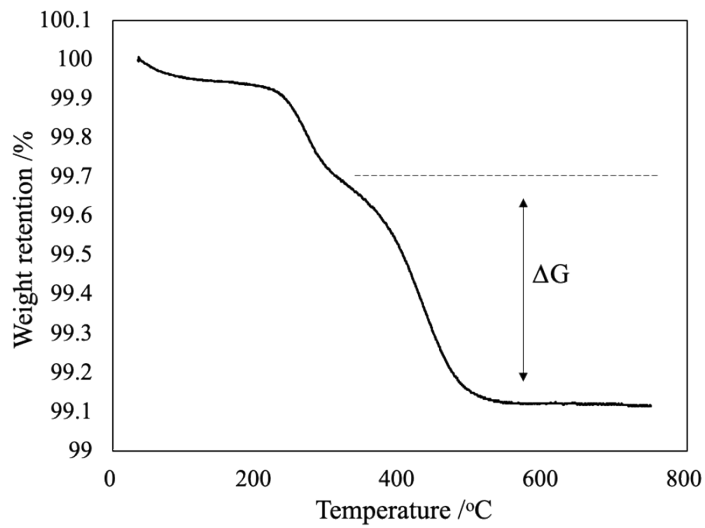

**Supplementary Fig. 2** The TGA analysis of the CNT-LCO electrode in air, where the CNT decomposition occurred at above 300 °C and had a weight loss about 0.5%

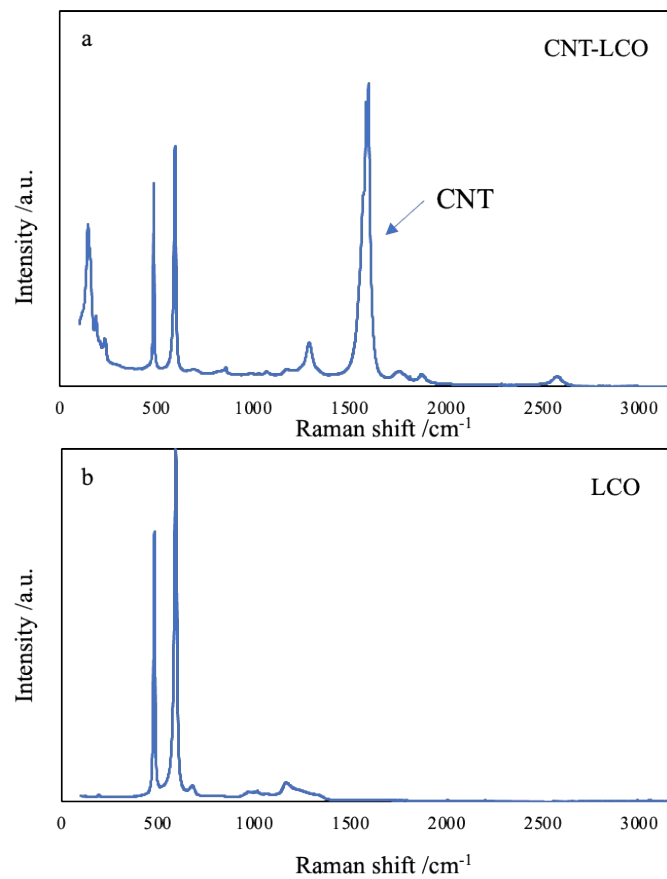

**Supplementary Fig. 3** The Raman analysis of the CNT-LCO electrode and pure LCO particles

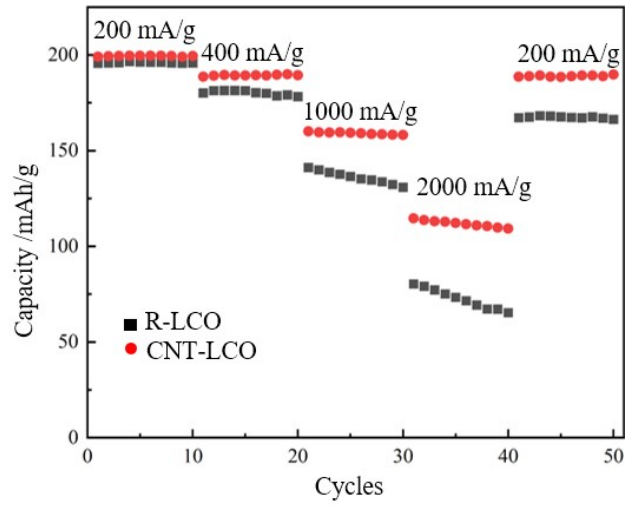

**Supplementary Fig. 4** The cycling performance of R-LCO and CNT-LCO under different current density

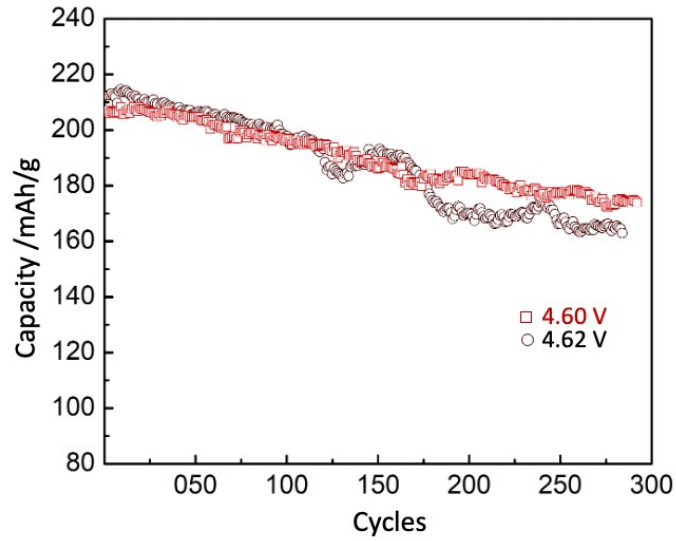

**Supplementary Fig. 5** The cycling performances of CNT-LCO with the upper voltages of 4.60 V and 4.62 V.

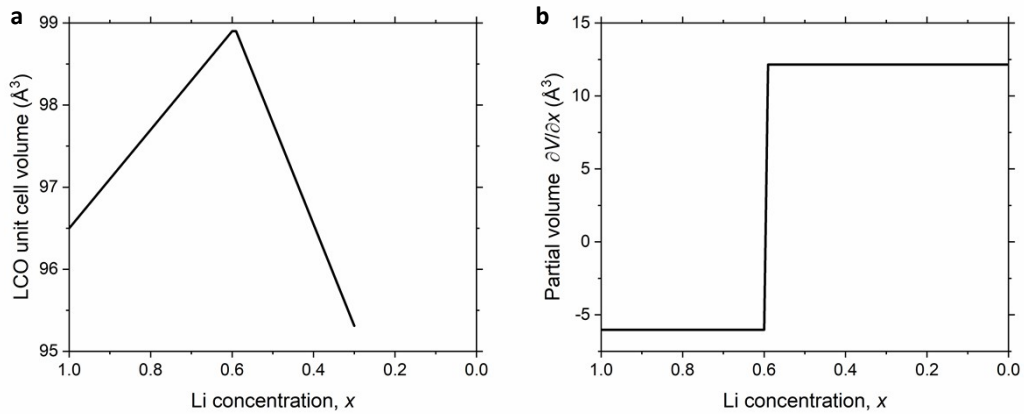

**Supplementary Fig. 6** (a) The piecewise linear relationship between the LCO unit cell volume and Li concentration. (b) The partial volume of Li with respect to the Li concentration

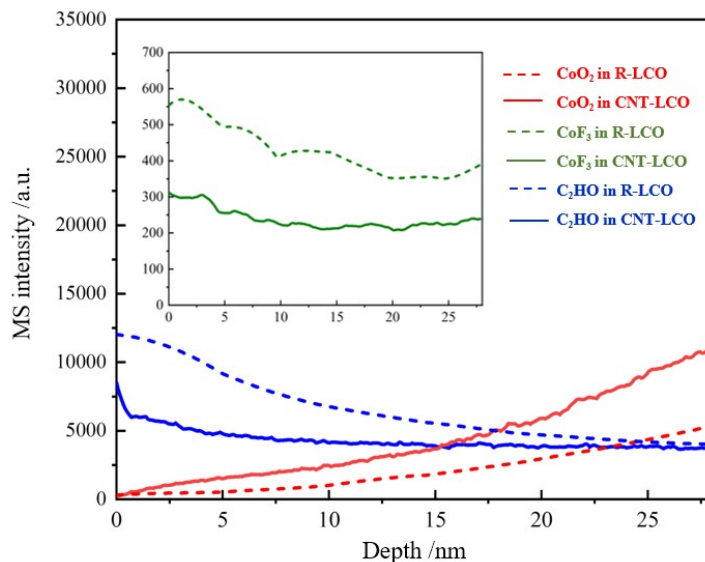

**Supplementary Fig. 7** The depth profile of CoO<sub>2</sub>, CoF<sub>3</sub> and C<sub>2</sub>HO species at the surface of R-LCO and CNT-LCO after high voltage cycles

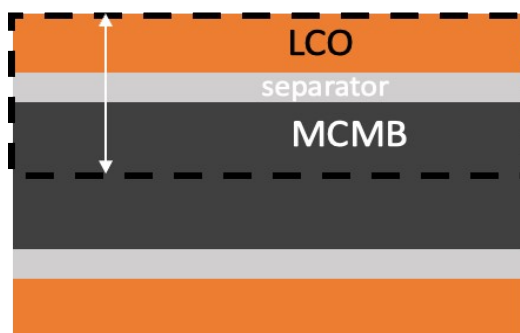

**Supplementary Fig. 8** The new structures of the full-cells that designed for the free-standing electrodes.

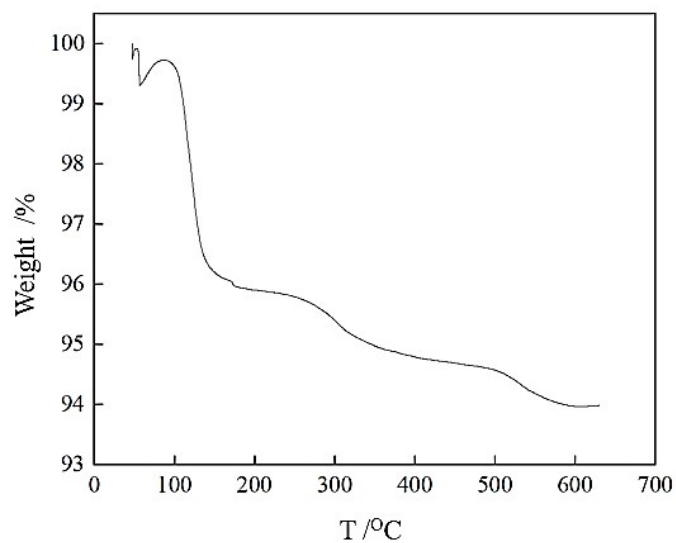

**Supplementary Fig. 9** The TG analysis of the cycled CNT-LCO

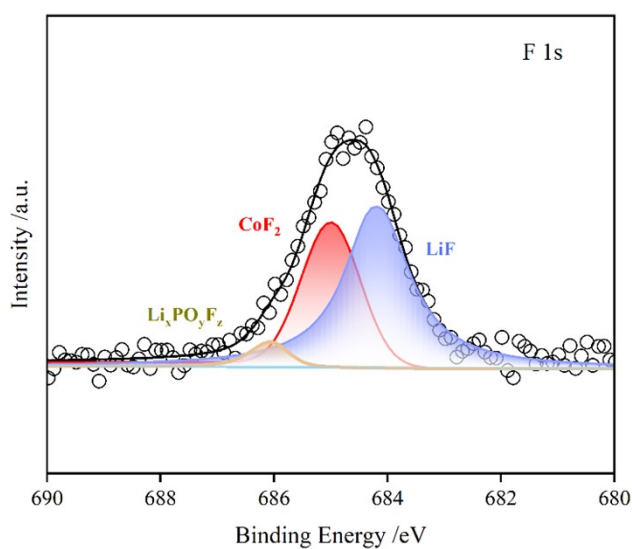

**Supplementary Fig. 10** The XPS analysis of F on the surface of the regenerated LCO

**Supplementary Table. 1** The details of CNT used for CNT-LCO

| CNT specification   | unit of measure | value   |
|---------------------|-----------------|---------|
| carbon content)     | wt. %           | 99±1    |
| CNT content)        | wt. %           | ≥93     |
| number of walls CNT | unit            | 1       |
| outer mean diameter | nm              | 1.6±0.4 |
| length of CNT       | μm              | >5      |
| metal impurities    | wt. %           | <1      |

|          |       |    |
|----------|-------|----|
| moisture | wt. % | <5 |
|----------|-------|----|

**Supplementary Table. 2** The voltage changes in the GITT tests of R-LCO and CNT-LCO.

Considering that  $L \propto \frac{\eta_1}{\eta_2^2}$ , the ratio of  $L$  in R-LCO to that in CNT-LCO can be estimated from the

ratio of  $\frac{\eta_1}{\eta_2^2}$  in the two materials.

|         | 10 <sup>th</sup> cycle |          |          |                 | 300 <sup>th</sup> cycle |          |          |                 |
|---------|------------------------|----------|----------|-----------------|-------------------------|----------|----------|-----------------|
|         | $IR_{\Omega}$          | $\eta_1$ | $\eta_2$ | $\eta_1/\eta_2$ | $IR_{\Omega}$           | $\eta_1$ | $\eta_2$ | $\eta_1/\eta_2$ |
| R-LCO   | 0.0506 V               | 0.0532 V | 0.0294 V | 1.81            | 0.2173 V                | 0.08 V   | 0.0127 V | 6.30            |
| CNT-LCO | 0.0487 V               | 0.0435 V | 0.0271 V | 1.60            | 0.0554 V                | 0.0534 V | 0.0268 V | 1.99            |

**Supplementary Table. 3** The loading of free-standing cathode and anode materials for pouch full-cells

|          | mAh/cm <sup>2</sup> | mg/cm <sup>2</sup> | g/cm <sup>3</sup> | mAh/g | CNT% |
|----------|---------------------|--------------------|-------------------|-------|------|
| CNT-LCO  | 6                   | 30.8               | 4.3               | 195   | 0.5  |
| CNT-MCMB | 6.5                 | 18.6               | 1.7               | 350   | 1    |

### Supplementary Discussion

Based on the structure of pouch full cell and loadings of cathode and anodes shown in Fig. 8 and Table. 3, the energy density can be evaluated with the following methods.

(1) For the volumetric energy density ( $E_v$ ),

$$d_{\text{cathode}} = 71.6 \text{ } \mu\text{m}$$

$$d_{\text{anode}} = 109.4 \text{ } \mu\text{m}$$

$$d_{\text{sep}} = 12 \text{ } \mu\text{m}$$

$$d = d_{\text{cathode}} + d_{\text{sep}} + d_{\text{anode}} = 193 \text{ } \mu\text{m}$$

$$E_v = 1212.5 \text{ Wh/L}$$

(2) For the weight energy density ( $E_w$ ),

$$L_{\text{separator}} = 0.8 \text{ mg/cm}^2$$

$$L_{\text{electrolyte}} = 2 \text{ g/Ah (12 mg/cm}^2)$$

$$E_w = 376.2 \text{ Wh/kg}$$

If includes the weight of tabs used in the full-cell, where 20 layers of cathode/anode were assembled in each unit cell, the energy density can be estimated as

$$m_{\text{Al tab}} = 32 \text{ mg},$$

$$m_{\text{Ni tab}} = 94 \text{ mg},$$

$$E_w = 341 \text{ Wh/kg}$$
